# Supplementary material
Source: PubMed Central journal article supplement (PMC7442667)

## SUPPLMENTAL MATERIAL

### Supplemental Table 1

| Study     | Year | Surgical Clipping |           |       | Endovascular Treatment |           |       |
|-----------|------|-------------------|-----------|-------|------------------------|-----------|-------|
|           |      | Death*            | Disabled* | Total | Death*                 | Disabled* | Total |
| Birski    | 2014 | 1                 | 1         | 45    | 2                      | 3         | 31    |
| Brilstra  | 2004 | 0.5               | 4.5       | 32    | 1                      | 1         | 19    |
| Brunken   | 2009 | 0.5               | 12.5      | 51    | 1                      | 16        | 87    |
| Dammann   | 2014 | 0.5               | 7.5       | 87    | 0.5                    | 1.5       | 16    |
| Iwamuro   | 2007 | 0.5               | 4.5       | 78    | 0.5                    | 0.5       | 54    |
| Johnston  | 2000 | 1                 | 10        | 68    | 1                      | 5         | 62    |
| Kim       | 2010 | 3                 | 11        | 846   | 2                      | 8         | 824   |
| Park      | 2014 | 0.5               | 0.5       | 12    | 0.5                    | 0.5       | 39    |
| Song      | 2015 | 2                 | 3         | 558   | 0.5                    | 1.5       | 566   |
| Wiebers   | 2003 | 29                | 55        | 1917  | 8                      | 10        | 451   |
| Alawi     | 2014 | 1                 | 5         | 70    | 7                      | 40        | 778   |
| Barker    | 2004 | 73                | 557       | 3498  | 7                      | 31        | 421   |
| Brinkij   | 2011 | 345               | 4184      | 29918 | 215                    | 1655      | 34125 |
| Higashida | 2007 | 47                | 202       | 1881  | 6                      | 37        | 654   |
| Jalbert   | 2015 | 92                | 1912      | 4357  | 120                    | 1196      | 7942  |
| Johnston  | 1999 | 54                | 382       | 2357  | 1                      | 26        | 255   |
| Johnston  | 2001 | 59                | 373       | 1699  | 2                      | 34        | 370   |
| McDonald  | 2013 | 10                | 232       | 1380  | 7                      | 56        | 1380  |

\* 0.5 was added when there were 0 events to allow estimation. Disabled was calculated from subtracting "death" and "favorable functional outcome" from the total, resulting in values ending in 0.5.

## Supplemental Table 2

| <u>Strategy</u>            | <u>Cost<sup>a</sup></u> | <u>Incr. Cost</u> | <u>QALY<sup>a</sup></u> | <u>Incr. QALY</u> | <u>ICER</u> | <u>Category<sup>b</sup></u> |
|----------------------------|-------------------------|-------------------|-------------------------|-------------------|-------------|-----------------------------|
| No Screen                  | 90                      | 0                 | 24.212                  | 0.000             | 0           | Undominated                 |
| Screen: 10                 | 1617                    | 1527              | 24.246                  | 0.033             | 45921       | Undominated                 |
| Screen: 10, 20             | 2562                    | 944               | 24.260                  | 0.014             | 65243       | Undominated                 |
| Screen: 10, 15, 20         | 2798                    | 236               | 24.261                  | 0.001             | 285995      | Extended dominance          |
| Screen: 10, 20, 30         | 3157                    | 359               | 24.266                  | 0.005             | 75700       | Undominated                 |
| Screen: 10, 15, 20, 25     | 3214                    | 57                | 24.265                  | -0.001            | -52328      | Absolute dominance          |
| Screen: 10, 20, 30, 40     | 3513                    | 355               | 24.267                  | 0.001             | 265764      | Undominated                 |
| Screen: 10, 20, 30, 40, 50 | 3703                    | 190               | 24.267                  | 0.000             | -1303878    | Absolute dominance          |
| Screen: 10-35, q5          | 3801                    | 288               | 24.268                  | 0.001             | 465687      | Undominated                 |
| Screen: 10-45, q5          | 4253                    | 452               | 24.268                  | 0.000             | 25327626    | Undominated                 |

ICER = incremental cost-effectiveness ratio

<sup>a</sup>QALYs and costs discounted at 3% per year

<sup>b</sup>There are 3 categories: undominated, extended dominance, and absolute dominance. Extended dominance means that a strategy (screen: 10, 15, 20) has a higher ICER than a more expensive but more efficient option (in this case, screen: 10, 20, and 30) relative to Screen: 10, 20. Absolute dominance means that the strategy is more costly and less effective than the comparative strategy.<sup>1</sup> Dominated strategies are removed from the final cost-effectiveness analysis.

## Supplemental Figure Legends

**Supplemental Figure 1** A simplified version of the tree. Circles represent possible chance events (transitions) and triangles represent the subsequent health state at the end of a Markov cycle.

**Supplemental Figure 2** Calibration results resulted in an annual aneurysm development rate of 0.00439 (based on minimizing the least squares difference). Model-estimated prevalence of intracranial aneurysm (IA) is plotted by age. The orange circles represent the reported prevalence of IA at a median age from three previously published studies.<sup>2-4</sup>

**Supplemental Figure 3** Tornado diagrams of one-way sensitivity analyses to demonstrate the effects of varying parameters on the incremental cost-effectiveness ratio (ICER) for screening at age 10 years vs. no screening versus (a), and screening at ages 10 and 20 versus at age 10 years (b). The wider bars at the top have the greatest effect on the ICER, while variations in inputs at the bottom have small effects. The willingness-to-pay (WTP) line is at an ICER of \$150,000. Variables that accounted for less than 0.1% of total uncertainty were excluded from the diagram.

**Supplemental Figure 4** One-way sensitivity analysis of the annual probability a small aneurysm (< 5 mm) grows versus net monetary benefit (higher is better) at a willingness-to-pay threshold of \$150,000 per quality adjusted life year (QALY). Growth is defined by increase in size  $\geq 1.0$  mm or an undisputable change in aneurysm shape (i.e. change from regular shape to irregular shape). At the base-case value of 0.057, screening at ages 10, 20, and 30 is preferred. If

probability of growth falls below 0.027, screening at ages 10 and 20 is preferred; and below 0.0098, screening at age 10; and then below 0.0051, no screening.

Supplemental Figure 1

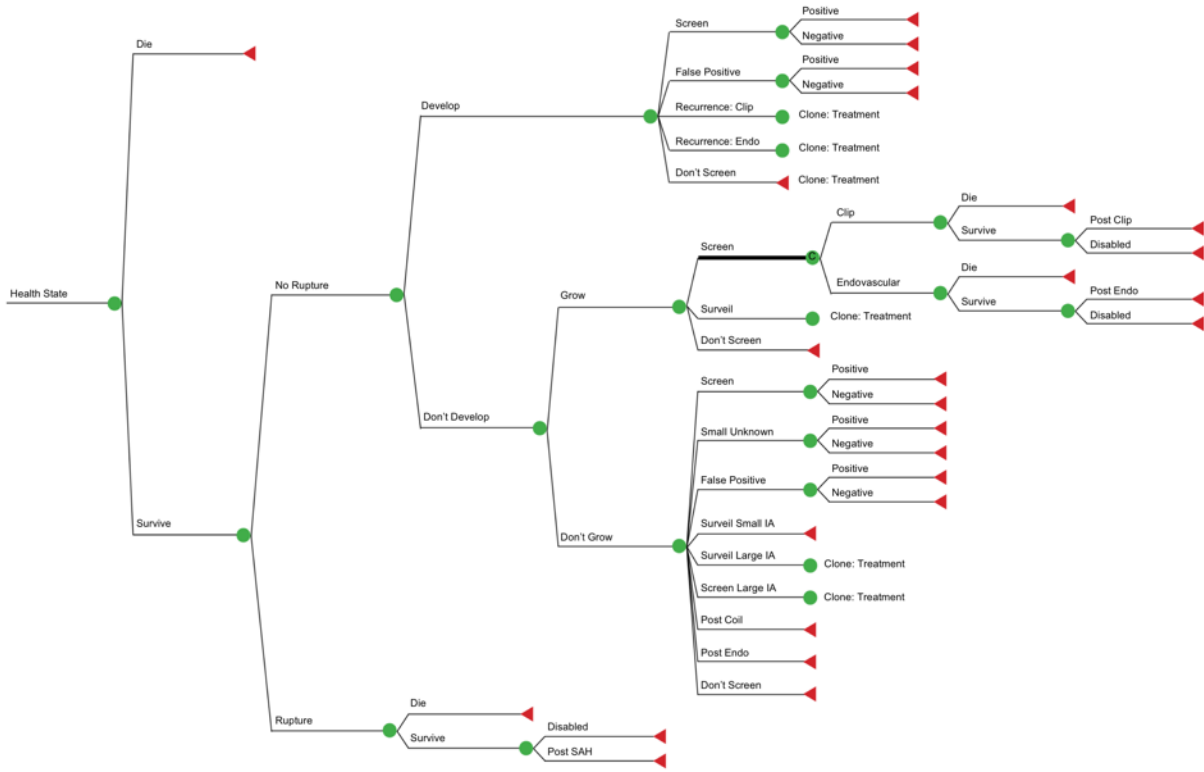

Supplemental Figure 2

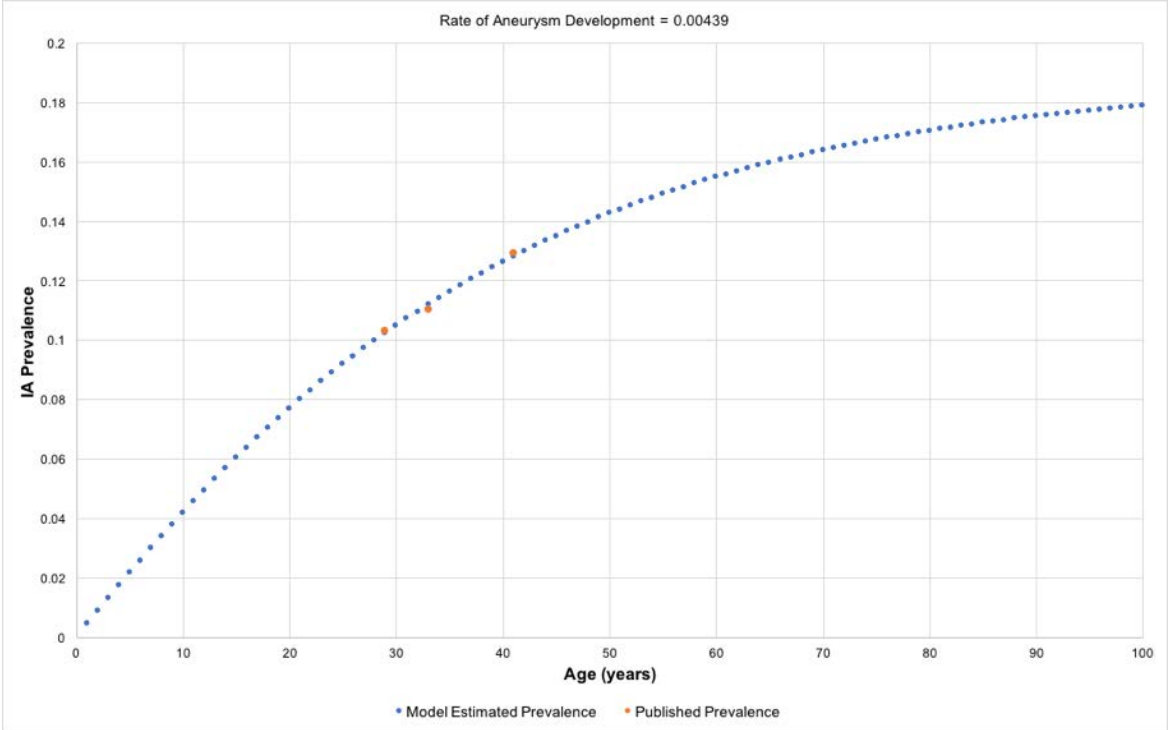

# Supplemental Figure 3

a

**Screening Age 10 Years vs. No Screening**

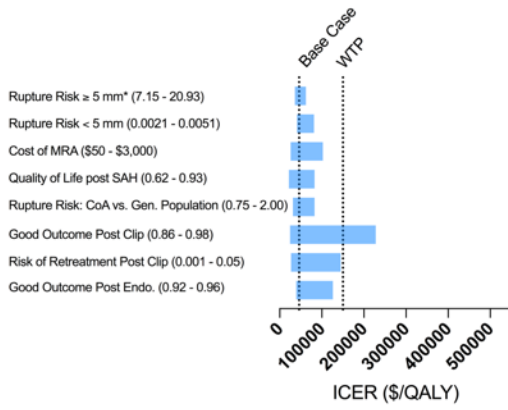

\*Risk of rupture for a large aneurysm is expressed as a hazard rate ratio of risk of rupture of a small aneurysm.

b

**Screening Ages 10 and 20 vs. Age 10 Years**

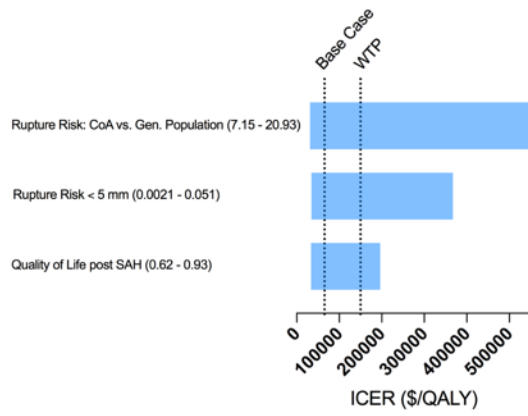

Supplemental Figure 4

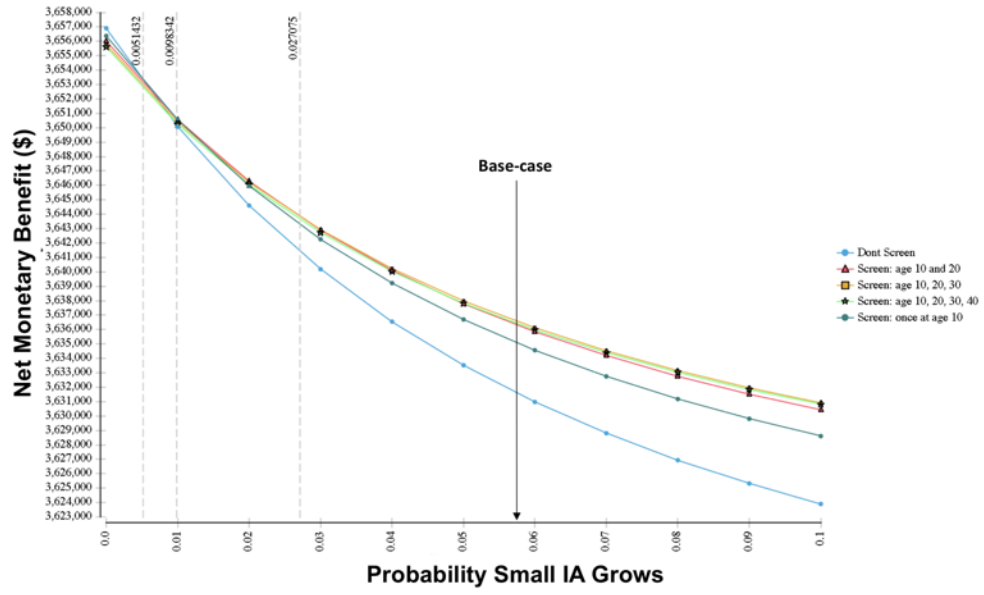

Supplement: NIHMS1608549-supplement-Supplemental_Material.pdf [file NIHMS1608549-supplement-Supplemental_Material.pdf]
